# Supplementary material for: β-Lactoglobulin's Conformational Requirements for Ligand Binding at the Calyx and the Dimer Interphase: a Flexible Docking Study
Source: PubMed Central journal article supplement (PMC3821863; doi:10.1371/journal.pone.0079530), 2013-11-08
Supplement: pone.0079530.s005.pdf [file pone.0079530.s005.pdf]

Supplemental Table 1.  $\beta$ -lg calyx-binding residues from the XRD structures.

|             | octanoic acid | decanoic acid | lauric acid | myristic acid | palmitic acid | Bromo-decanoic | linoleic acid | oleic acid  | stearic acid | retinol     | retinoic acid | Vitamin D3  | Decyl Maltoside |
|-------------|---------------|---------------|-------------|---------------|---------------|----------------|---------------|-------------|--------------|-------------|---------------|-------------|-----------------|
| I12         |               |               |             |               |               |                |               |             | Green        |             |               |             |                 |
| P38         |               |               |             | Red           | Red           |                | Red           | Red         | Red          |             |               | Red         | Red             |
| L39         |               | Blue          |             |               |               |                |               |             |              | Blue        | Blue          | Blue        |                 |
| V41         |               |               | Blue        | Blue          |               |                | Blue          | Blue        |              |             | Blue          | Blue        |                 |
| V43         |               |               |             |               |               |                |               |             |              |             |               | Green       |                 |
| <b>L46</b>  |               | Red           | Red         |               | Red           | Red            | Red           | Red         | Red          |             |               |             |                 |
| <b>L54</b>  |               | Red           | Red         | Red           | Red           |                | Red           | Red         | Red          |             |               |             |                 |
| <b>I56</b>  | Red           | Red           | Red         |               |               | Red            | Red           | Red         |              |             | Red           | Red         | Red             |
| L58         |               |               |             | Green         |               |                |               |             |              |             |               |             |                 |
| K60         |               |               |             |               | Red           | Red            | Red           | Red         | Red          |             |               | Red         | Red             |
| E62         |               |               |             |               | Blue          |                | Blue          | Blue        |              | Blue        |               | Blue        |                 |
| K69         | Red           |               |             | Red           | Red           | Red            | Red           |             |              | Red         | Red           |             |                 |
| <b>I71</b>  | Red           | Red           |             | Red           | Red           | Red            | Red           | Red         | Red          | Red         | Red           | Red         |                 |
| <b>I84</b>  |               | Red           | Red         | Red           | Red           | Red            |               | Red         | Red          |             |               | Red         | Red             |
| A86         |               |               |             |               |               |                |               |             |              |             |               | Green       | Green           |
| L87         |               |               |             |               |               |                |               |             |              |             |               |             | Green           |
| N88         |               |               |             |               |               |                |               |             |              |             |               |             | Green           |
| V92         | Red           |               | Red         |               |               | Red            | Red           | Red         | Red          | Red         | Red           |             |                 |
| V94         |               | Blue          |             | Blue          | Blue          |                | Blue          | Blue        | Blue         |             |               |             |                 |
| L103        |               |               | Blue        | Blue          |               |                |               | Blue        |              |             |               |             | Blue            |
| <b>F105</b> |               | Red           | Red         | Red           | Red           | Red            | Red           | Red         | Red          | Red         | Red           | Red         | Red             |
| <b>M107</b> | Red           | Red           | Red         | Red           | Red           | Red            | Red           | Red         | Red          | Red         | Red           | Red         | Red             |
| Q120        |               |               |             |               |               |                |               |             |              | Green       | Green         |             |                 |
| <b>PDB</b>  | <b>3NQ9</b>   | <b>3NQ3</b>   | <b>3UEU</b> | <b>3UEV</b>   | <b>3UEW</b>   | <b>1BSO</b>    | <b>4DQ4</b>   | <b>4DQ3</b> | <b>3UEX</b>  | <b>1GX8</b> | <b>1GX9</b>   | <b>2GJ5</b> | <b>2R56</b>     |

Color code is red for residues with at least 7 contacts with the ligand, blue for residues with 3 to 6 contacts and green for residues with 2 or less.
